# Supplementary material for: Single-cell biological network inference using a heterogeneous graph transformer
Source: Springer Nature journal article supplement (doi:10.1038/s41467-023-36559-0), 2023-02-21
Supplement: 41467_2023_36559_MOESM3_ESM.pdf [file 41467_2023_36559_MOESM3_ESM.pdf]

## Description of Additional Supplementary Files

**Supplementary Data 1.** All datasets collection in DeepMAPS.

**Supplementary Data 2.** Curated marker for cell cluster annotation in CITE-seq case study

**Supplementary Data 3.** UMAPs of all 128 embeddings of CITE-seq case data

**Supplementary Data 4.** Curated marker genes for cell cluster annotation in the scRNA ATAC-seq case study

**Supplementary Data 5.** Comparison of public single-cell analysis servers

**Supplementary Data 6.** Computing time comparison (h/m/s)
